# Supplementary material
Source: HighWire-hosted journal article supplement (https://bmjopen.bmj.com/content/14/1/e076768)
Supplement: inline-supplementary-material-1 [file inline-supplementary-material-1.pdf]

Supplement Table. Codes applied within each panel discussion by sub-theme

| Sub-theme                                                      | Practitioner panel                                                                                                                                                                                       | Patient-Caregiver panel                                                                                                                                          |
|----------------------------------------------------------------|----------------------------------------------------------------------------------------------------------------------------------------------------------------------------------------------------------|------------------------------------------------------------------------------------------------------------------------------------------------------------------|
| <i>Quality as the patient and caregiver experience of care</i> |                                                                                                                                                                                                          |                                                                                                                                                                  |
| Respect for autonomy and person-centeredness                   | <ul style="list-style-type: none"> <li>• Patient autonomy and choice</li> <li>• Patient centeredness</li> <li>• Convenience or disruption to patients</li> </ul>                                         | <ul style="list-style-type: none"> <li>• Patient autonomy and choice</li> <li>• Patient centeredness</li> <li>• Convenience or disruption to patients</li> </ul> |
| Transparency and sharing information                           | <ul style="list-style-type: none"> <li>• Sharing information</li> <li>• Transparency, disclosure to patients</li> </ul>                                                                                  | <ul style="list-style-type: none"> <li>• Sharing information</li> <li>• Transparency, disclosure to patients</li> </ul>                                          |
| Timeliness                                                     | <ul style="list-style-type: none"> <li>• Timeliness</li> <li>• Following up or closing the loop</li> <li>• Disconnect between documentation and action</li> </ul>                                        | <ul style="list-style-type: none"> <li>• Timeliness</li> <li>• Following up or closing the loop</li> </ul>                                                       |
| <i>Quality as technical competence</i>                         |                                                                                                                                                                                                          |                                                                                                                                                                  |
| Clear purpose and action                                       | (no codes applied)                                                                                                                                                                                       | <ul style="list-style-type: none"> <li>• Following up or closing the loop</li> <li>• Actionability, action follows assessment</li> </ul>                         |
| Adhering to best medical practice                              | <ul style="list-style-type: none"> <li>• Best medical care or practice</li> <li>• Practices that may be flawed</li> <li>• Clinical importance, relevance</li> <li>• Evidence quality</li> </ul>          | (no codes applied)                                                                                                                                               |
| Mitigating side effects                                        | <ul style="list-style-type: none"> <li>• Consideration of side effects</li> <li>• Unintended consequences</li> </ul>                                                                                     | (no codes applied)                                                                                                                                               |
| <i>Quality as the structure of health systems</i>              |                                                                                                                                                                                                          |                                                                                                                                                                  |
| Feasibility of enacting a practice                             | <ul style="list-style-type: none"> <li>• Feasibility and operationalization</li> <li>• Incentive structures</li> <li>• Linking processes to measures</li> </ul>                                          | <ul style="list-style-type: none"> <li>• Feasibility and operationalization</li> <li>• Actionability, action follows assessment</li> </ul>                       |
| Health system resources and costs                              | <ul style="list-style-type: none"> <li>• Health system costs of care</li> <li>• Policy and external influences</li> <li>• Context of implementation – existing practices, available resources</li> </ul> | (no codes applied)                                                                                                                                               |
| Equitable care for all patients                                | <ul style="list-style-type: none"> <li>• Equitable care</li> <li>• Concerns about variation in practice due to provider characteristics</li> </ul>                                                       | <ul style="list-style-type: none"> <li>• Equitable care</li> <li>• Concerns about variation in practice due to provider characteristics</li> </ul>               |
